# Supplementary material for: Spatiotemporal distributions of Fukushima-derived radionuclides in nearby marine surface sediments
Source: Copernicus journal article supplement (doi:10.5194/bg-10-5019-2013), 2013-07-25
Supplement: Supplementary file 1 [file bg-10-5019-2013-supplement.zip]

Table S2-2. Concentrations of radionuclides in the sediments collected in the waters off Miyagi, Fukushima, and Ibaraki Prefectures in Japan

| Stn. | Sampling Date                                                                                                                                                         | I-131<br>(Bq/kg)       | Te-129m<br>(Bq/kg)                                                                                              | Te-129<br>(Bq/kg)                                                                              | Nb-95<br>(Bq/kg)                                                      | Ag-110m<br>(Bq/kg)                                                                                                              | Sb-125<br>(Bq/kg)                                     | Sr-90<br>(Bq/kg)                                                                                   | Sr-89<br>(Bq/kg) |
|------|-----------------------------------------------------------------------------------------------------------------------------------------------------------------------|------------------------|-----------------------------------------------------------------------------------------------------------------|------------------------------------------------------------------------------------------------|-----------------------------------------------------------------------|---------------------------------------------------------------------------------------------------------------------------------|-------------------------------------------------------|----------------------------------------------------------------------------------------------------|------------------|
| B1   | 2011/5/11<br>2011/5/25                                                                                                                                                | 1.6 ± 0.4              | 27 ± 4.6<br>13 ± 3.9                                                                                            | 13 ± 4.1                                                                                       |                                                                       |                                                                                                                                 |                                                       | ND                                                                                                 |                  |
| B3   | 2011/9/14<br>2011/10/18<br>2011/12/14<br>2012/2/17                                                                                                                    |                        |                                                                                                                 |                                                                                                |                                                                       | 1.5 ± 0.17<br><br>0.74 ± 0.2                                                                                                    |                                                       | 0.36 ± 0.037<br>0.24 ± 0.079<br>0.22 ± 0.065<br>ND                                                 | ND<br>ND<br>ND   |
| C1   | 2011/5/11<br>2011/5/25<br>2011/6/9<br>2011/7/30                                                                                                                       | 5.2 ± 0.3<br>1.0 ± 0.2 | 44 ± 3.3<br>22 ± 2.9<br>11 ± 2.7                                                                                | 29 ± 2.9<br>13 ± 2.3<br>8.7 ± 2.3                                                              | 0.82 ± 0.17                                                           | <br><br>0.39 ± 0.08                                                                                                             |                                                       | ND                                                                                                 |                  |
| C3   | 2011/9/14                                                                                                                                                             |                        |                                                                                                                 |                                                                                                |                                                                       |                                                                                                                                 |                                                       | 0.12 ± 0.036                                                                                       |                  |
| D1   | 2011/5/10<br>2011/5/24<br>2011/6/7<br>2011/6/21<br>2011/7/6<br>2011/7/30<br>2011/9/13<br>2011/9/13<br>2011/9/13<br>2011/9/13<br>2011/10/19<br>2011/12/13<br>2012/2/21 | 2.7 ± 0.7              | 120 ± 8.8<br>45 ± 7<br>63 ± 6.5<br>55 ± 4.6<br>18 ± 3.8<br>21 ± 5.7<br><br>18 ± 4.6<br><br>93 ± 6.6<br>100 ± 10 | 76 ± 7.2<br><br>43 ± 5.6<br>46 ± 4.1<br>18 ± 3.4<br><br><br>69 ± 7.5<br>66 ± 10                | 1.4 ± 0.39<br><br>0.81 ± 0.22<br><br><br>4.9 ± 0.42<br><br>1.6 ± 0.44 | <br><br>0.82 ± 0.22<br>0.87 ± 0.15<br>0.74 ± 0.13<br><br>0.86 ± 0.13<br>0.93 ± 0.16<br>3.8 ± 0.18<br><br>1.2 ± 0.17             | <br><br><br><br><br><br>10 ± 0.79<br><br>0.11 ± 0.033 | ND<br><br>ND<br><br>ND<br><br>0.32 ± 0.036<br><br><br>0.13 ± 0.032<br>0.24 ± 0.036<br>0.11 ± 0.033 |                  |
| E1   | 2011/5/10<br>2011/5/24<br>2011/6/7<br>2011/6/21<br>2011/7/6<br>2011/7/29<br>2011/9/11<br>2011/10/22<br>2011/12/10<br>2012/2/13                                        | 4.3 ± 0.4              | 190 ± 5<br>110 ± 6<br>140 ± 7.3<br>30 ± 2.9<br>240 ± 8.6<br>100 ± 4.3<br>73 ± 6.6<br>33 ± 7.7                   | 120 ± 3.3<br>72 ± 4.2<br>99 ± 5.4<br>15 ± 1.9<br>140 ± 6.8<br>62 ± 3.2<br>48 ± 3.8<br>26 ± 3.5 | 0.89 ± 0.15                                                           | 0.81 ± 0.13<br>0.76 ± 0.17<br>1.3 ± 0.2<br><br>2.7 ± 0.27<br>1.4 ± 0.12<br>2.7 ± 0.19<br>3.2 ± 0.21<br>2.6 ± 0.21<br>2.2 ± 0.19 |                                                       | ND<br><br>ND<br><br>ND<br><br>0.11 ± 0.034<br>0.12 ± 0.034<br>0.12 ± 0.037                         | ND               |
| F1   | 2011/5/9<br>2011/5/23<br>2011/6/6                                                                                                                                     | 4.6 ± 0.3<br>1.6 ± 0.3 | 100 ± 4.3<br>100 ± 4.7<br>95 ± 4.7                                                                              | 66 ± 3.1<br>68 ± 2.9<br>67 ± 3.2                                                               | 1.6 ± 0.19<br>1 ± 0.081<br>0.82 ± 0.076                               | 0.56 ± 0.12<br>0.7 ± 0.13                                                                                                       |                                                       | ND<br><br>ND                                                                                       |                  |

| Stn. | Sampling Date | I-131<br>(Bq/kg) | Te-129m<br>(Bq/kg) | Te-129<br>(Bq/kg) | Nb-95<br>(Bq/kg) | Ag-110m<br>(Bq/kg) | Sb-125<br>(Bq/kg) | Sr-90<br>(Bq/kg) | Sr-89<br>(Bq/kg) |
|------|---------------|------------------|--------------------|-------------------|------------------|--------------------|-------------------|------------------|------------------|
| F1   | 2011/6/20     |                  | 100 ± 6            | 55 ± 4.4          | 1.1 ± 0.26       | 0.63 ± 0.18        |                   | ND               |                  |
|      | 2011/7/5      |                  | 59 ± 3.6           | 44 ± 2.7          | 0.62 ± 0.061     | 0.57 ± 0.11        |                   |                  |                  |
|      | 2011/7/29     |                  | 59 ± 5.3           | 31 ± 4.4          |                  | 1.1 ± 0.17         |                   |                  |                  |
|      | 2011/9/11     |                  |                    | 20 ± 3.1          |                  | 0.73 ± 0.16        | 3.6 ± 0.58        |                  |                  |
|      | 2011/10/23    |                  |                    | 7.1 ± 2.3         |                  | 0.67 ± 0.14        |                   |                  |                  |
|      | 2011/12/9     |                  |                    |                   |                  | 0.43 ± 0.17        |                   |                  |                  |
|      | 2012/2/12     |                  |                    |                   |                  | 0.45 ± 0.16        |                   | 0.16 ± 0.034     |                  |
| F3   | 2011/9/11     |                  |                    |                   |                  | 0.27 ± 0.13        |                   |                  |                  |
|      | 2012/2/13     |                  |                    |                   |                  | 0.54 ± 0.13        | 3.5 ± 0.4         |                  |                  |
| G0   | 2011/9/10     |                  | 41 ± 7.2           | 29 ± 4.2          |                  | 1.5 ± 0.2          | 3.9 ± 0.69        | 0.2 ± 0.035      |                  |
|      | 2011/10/23    |                  |                    |                   |                  | 0.73 ± 0.2         |                   | 0.19 ± 0.03      |                  |
|      | 2011/12/9     |                  |                    |                   |                  | 1.1 ± 0.17         |                   |                  |                  |
|      | 2012/2/11     |                  |                    |                   |                  | 1.1 ± 0.19         |                   |                  |                  |
| G1   | 2011/5/9      | 6.1 ± 0.3        | 38 ± 3.2           | 23 ± 2.2          |                  |                    |                   |                  |                  |
|      | 2011/5/23     | 2.5 ± 0.4        | 33 ± 6             | 21 ± 4            |                  |                    |                   |                  |                  |
|      | 2011/6/6      | 1.5 ± 0.4        | 47 ± 5.4           | 30 ± 4            |                  |                    |                   |                  |                  |
|      | 2011/6/20     |                  | 66 ± 5.7           | 48 ± 5.2          |                  |                    |                   |                  |                  |
|      | 2011/7/5      |                  | 22 ± 5.4           |                   |                  |                    |                   |                  |                  |
|      | 2011/7/28     |                  | 15 ± 3.2           |                   |                  |                    |                   |                  |                  |
|      | 2011/9/10     |                  |                    |                   |                  | 0.35 ± 0.14        |                   |                  |                  |
|      | 2011/10/23    |                  |                    | 9.6 ± 2.9         |                  | 0.84 ± 0.17        |                   |                  |                  |
|      | 2011/12/9     |                  |                    |                   |                  | 0.91 ± 0.16        | 2.4 ± 0.57        | ND               |                  |
|      | 2012/2/12     |                  |                    |                   |                  | 0.63 ± 0.18        | 2 ± 0.53          |                  |                  |
| H1   | 2011/5/13     | 1.6 ± 0.4        | 37 ± 4.6           | 26 ± 3.4          | 1.3 ± 0.26       |                    |                   | ND               |                  |
|      | 2011/5/27     |                  | 140 ± 6.5          | 84 ± 4.2          |                  |                    |                   |                  |                  |
|      | 2011/6/10     |                  | 41 ± 5.7           | 28 ± 3.8          |                  |                    |                   |                  |                  |
|      | 2011/6/25     |                  | 39 ± 2.9           | 20 ± 2.2          |                  |                    |                   |                  |                  |
|      | 2011/7/5      |                  | 28 ± 4.5           | 22 ± 3.5          | 1.2 ± 0.25       |                    |                   |                  |                  |
|      | 2011/7/25     |                  | 19 ± 3.2           | 9.6 ± 2.7         |                  |                    |                   |                  |                  |
|      | 2011/9/9      |                  | 22 ± 4.9           | 8.5 ± 2.3         |                  | 0.41 ± 0.15        |                   |                  |                  |
|      | 2011/10/23    |                  |                    |                   |                  | 0.51 ± 0.15        |                   |                  |                  |
|      | 2012/2/9      |                  |                    |                   |                  | 0.5 ± 0.15         |                   |                  |                  |
| H3   | 2011/9/9      |                  |                    | 6.4 ± 2.1         |                  | 0.76 ± 0.13        |                   |                  |                  |
|      | 2011/10/24    |                  |                    |                   |                  | 0.39 ± 0.12        |                   |                  |                  |
|      | 2011/12/7     |                  |                    |                   |                  | 0.57 ± 0.13        |                   |                  |                  |
|      | 2012/2/10     |                  |                    |                   |                  | 0.27 ± 0.13        |                   |                  |                  |
| I0   | 2011/9/9      |                  | 29 ± 4.7           | 16 ± 2.9          |                  | 1.9 ± 0.16         | 4.7 ± 0.47        | 0.2 ± 0.031      |                  |
|      | 2011/10/25    |                  |                    |                   |                  | 2.3 ± 0.21         | 3.5 ± 0.82        | 0.22 ± 0.032     |                  |
|      | 2011/12/7     |                  |                    |                   |                  | 1.4 ± 0.21         | 4.3 ± 0.85        |                  |                  |

| Stn. | Sampling Date | I-131<br>(Bq/kg) | Te-129m<br>(Bq/kg) | Te-129<br>(Bq/kg) | Nb-95<br>(Bq/kg) | Ag-110m<br>(Bq/kg) | Sb-125<br>(Bq/kg) | Sr-90<br>(Bq/kg) | Sr-89<br>(Bq/kg) |
|------|---------------|------------------|--------------------|-------------------|------------------|--------------------|-------------------|------------------|------------------|
| I0   | 2012/2/9      |                  |                    |                   |                  | 1.4 ± 0.21         | 7.8 ± 0.82        |                  |                  |
| I1   | 2011/5/13     | 2.1 ± 0.2        |                    |                   |                  |                    |                   |                  |                  |
|      | 2011/5/27     | 3.0 ± 0.3        | 51 ± 3.9           | 34 ± 3.2          | 2 ± 0.2          |                    | 2.1 ± 0.66        |                  |                  |
|      | 2011/6/9      |                  | 15 ± 3.4           | 11 ± 2.3          |                  |                    |                   |                  |                  |
|      | 2011/6/23     |                  |                    |                   |                  |                    |                   |                  |                  |
|      | 2011/7/6      |                  |                    |                   |                  |                    |                   | ND               |                  |
|      | 2011/7/28     |                  |                    |                   |                  |                    |                   |                  |                  |
|      | 2011/9/9      |                  |                    |                   |                  | 0.58 ± 0.13        |                   |                  |                  |
|      | 2011/10/25    |                  |                    |                   |                  | 1.3 ± 0.19         |                   | 0.1 ± 0.032      |                  |
|      | 2011/12/7     |                  |                    |                   |                  | 2 ± 0.23           | 4.1 ± 1           | 0.46 ± 0.039     |                  |
|      | 2012/2/9      |                  |                    |                   |                  | 1.3 ± 0.22         | 5.8 ± 0.9         | 0.35 ± 0.039     |                  |
| I3   | 2011/9/9      |                  |                    |                   |                  |                    | 0.8 ± 0.23        |                  |                  |
|      | 2012/2/9      |                  |                    |                   |                  | 0.31 ± 0.12        |                   |                  |                  |
| J1   | 2011/5/13     | 5.2 ± 0.4        | 65 ± 5.2           | 43 ± 3.6          | 1.9 ± 0.24       |                    |                   | ND               |                  |
|      | 2011/5/25     |                  | 25 ± 4             | 21 ± 2.9          |                  |                    |                   |                  |                  |
|      | 2011/6/8      | 1.3 ± 0.3        | 17 ± 4             | 19 ± 4            |                  |                    |                   | ND               |                  |
|      | 2011/7/6      |                  | 27 ± 4.4           |                   | 0.69 ± 0.23      |                    |                   | ND               |                  |
|      | 2011/9/8      |                  | 55 ± 6.3           | 37 ± 4.4          | 2.5 ± 0.25       | 3.9 ± 0.19         | 11 ± 0.72         | 1.9 ± 0.11       | ND               |
|      | 2011/12/6     |                  |                    |                   |                  |                    |                   | ND               |                  |
|      | 2012/2/6      |                  |                    |                   |                  |                    |                   | ND               |                  |
| J2   | 2011/9/8      |                  |                    |                   |                  | 0.54 ± 0.097       | 1.2 ± 0.23        |                  |                  |
|      | 2012/2/5      |                  |                    |                   |                  |                    | 1.7 ± 0.28        |                  |                  |
| J3   | 2011/12/6     |                  |                    |                   |                  |                    | 1.3 ± 0.33        |                  |                  |
| K1   | 2011/5/14     |                  | 6.6 ± 2            |                   |                  |                    |                   |                  |                  |
|      | 2011/5/25     |                  |                    |                   |                  |                    |                   |                  |                  |
|      | 2011/6/7      |                  | 14 ± 4.3           |                   |                  |                    |                   | ND               |                  |
|      | 2011/6/22     |                  |                    |                   |                  |                    |                   |                  |                  |
|      | 2011/7/7      |                  |                    |                   |                  |                    |                   | ND               |                  |
|      | 2011/7/26     |                  | 14 ± 3.3           | 15 ± 3.1          |                  | 0.65 ± 0.11        |                   |                  |                  |
| L3   | 2011/10/13    |                  |                    |                   |                  | 4.9 ± 0.2          |                   |                  |                  |

Radioactivities listed above were corrected for decay for the sampling date

ND: not detected
