# Supplementary material for: Spatiotemporal distributions of Fukushima-derived radionuclides in nearby marine surface sediments
Source: Copernicus journal article supplement (doi:10.5194/bg-10-5019-2013), 2013-07-25
Supplement: Supplementary file 2 [file bg-10-5019-2013-supplement.zip]

Table S1. List of sediment samples collected in the water off Miyagi, Fukushima, and Ibaraki Prefectures in Japan.

| Stn. | Sampling Date | Latitude (N) | Longitude (E) | Water Depth(m) | Bulk Density | Water Content |
|------|---------------|--------------|---------------|----------------|--------------|---------------|
| A1   | 2011/5/11     | 38° 29.6′    | 141° 50.7′    | 200            | 1.72         | 0.323         |
|      | 2011/5/26     | 38° 30.1′    | 141° 51.2′    | 211            | 1.73         | 0.345         |
|      | 2011/6/10     | 38° 30.0′    | 141° 51.0′    | 206            | 1.70         | 0.343         |
|      | 2011/6/23     | 38° 30.0′    | 141° 51.0′    | 205            | 1.70         | 0.330         |
|      | 2011/7/8      | 38° 29.8′    | 141° 51.2′    | 212            | 1.73         | 0.298         |
|      | 2011/7/31     | 38° 29.9′    | 141° 51.0′    | 207            | 1.73         | 0.298         |
|      | 2011/9/15     | 38° 30.0′    | 141° 50.9′    | 209            | 1.69         | 0.349         |
|      | 2011/10/17    | 38° 29.9′    | 141° 51.2′    | 214            | 1.72         | 0.314         |
|      | 2011/12/15    | 38° 30.0′    | 141° 50.9′    | 205            | 1.64         | 0.342         |
|      | 2012/2/19     | 38° 30.0′    | 141° 50.9′    | 208            | 1.62         | 0.359         |
| a1   | 2011/9/15     | 38° 15.0′    | 141° 50.9′    | 217            | 1.77         | 0.283         |
|      | 2011/10/17    | 38° 14.9′    | 141° 51.0′    | 214            | 1.68         | 0.350         |
|      | 2011/12/16    | 38° 15.1′    | 141° 50.8′    | 211            | 1.68         | 0.283         |
|      | 2012/2/20     | 38° 14.9′    | 141° 51.0′    | 215            | 1.67         | 0.350         |
| A3   | 2011/9/15     | 38° 30.0′    | 142° 04.9′    | 495            | 1.55         | 0.401         |
|      | 2011/10/17    | 38° 30.0′    | 142° 05.0′    | 483            | 1.61         | 0.381         |
|      | 2011/12/15    | 38° 30.1′    | 142° 05.1′    | 486            | 1.53         | 0.430         |
|      | 2012/2/19     | 38° 29.9′    | 142° 05.0′    | 490            | 1.57         | 0.385         |
| B1   | 2011/5/11     | 38° 05.6′    | 141° 15.7′    | 45             | 1.95         | 0.172         |
|      | 2011/5/25     | 38° 05.1′    | 141° 15.6′    | 45             | 1.99         | 0.191         |
|      | 2011/6/9      | 38° 05.0′    | 141° 15.5′    | 45             | 1.80         | 0.147         |
|      | 2011/6/22     | 38° 05.0′    | 141° 15.4′    | 45             | 1.93         | 0.160         |
|      | 2011/7/7      | 38° 05.1′    | 141° 15.3′    | 45             | 2.01         | 0.151         |
|      | 2011/7/31     | 38° 05.1′    | 141° 15.3′    | 44             | 2.01         | 0.151         |
|      | 2011/9/14     | 38° 05.1′    | 141° 15.3′    | 45             | 1.94         | 0.150         |
|      | 2011/10/18    | 38° 05.1′    | 141° 15.6′    | 45             | 1.94         | 0.147         |
|      | 2011/12/16    | 38° 05.0′    | 141° 15.4′    | 45             | 1.91         | 0.176         |
|      | 2012/2/17     | 38° 05.0′    | 141° 15.4′    | 45             | 1.89         | 0.176         |
| B3   | 2011/9/14     | 38° 05.0′    | 141° 29.3′    | 121            | 1.17         | 0.724         |
|      | 2011/10/18    | 38° 05.0′    | 141° 29.2′    | 118            | 1.20         | 0.713         |
|      | 2011/12/14    | 38° 04.9′    | 141° 29.2′    | 119            | 1.20         | 0.687         |
|      | 2012/2/17     | 38° 04.9′    | 141° 29.4′    | 120            | 1.20         | 0.702         |
| C1   | 2011/5/11     | 37° 45.2′    | 141° 16.2′    | 59             | 2.00         | 0.176         |
|      | 2011/5/25     | 37° 45.4′    | 141° 15.3′    | 55             | 2.05         | 0.179         |
|      | 2011/6/9      | 37° 45.0′    | 141° 15.4′    | 56             | 1.80         | 0.106         |
|      | 2011/6/22     | 37° 45.0′    | 141° 15.3′    | 56             | 1.88         | 0.133         |
|      | 2011/7/7      | 37° 44.9′    | 141° 15.4′    | 57             | 1.70         | 0.092         |
|      | 2011/7/30     | 37° 45.2′    | 141° 15.5′    | 55             | 1.70         | 0.092         |
|      | 2011/9/14     | 37° 45.1′    | 141° 15.5′    | 57             | 1.97         | 0.170         |
|      | 2011/10/19    | 37° 45.0′    | 141° 15.5′    | 56             | 1.94         | 0.164         |

| Stn. | Sampling Date | Latitude (N) | Longitude (E) | Water Depth(m) | Bulk Density | Water Content |
|------|---------------|--------------|---------------|----------------|--------------|---------------|
| C1   | 2011/12/13    | 37° 44.9′    | 141° 15.4′    | 56             | 1.61         | 0.189         |
|      | 2012/2/17     | 37° 44.9′    | 141° 15.4′    | 56             | 1.98         | 0.169         |
| C3   | 2011/9/14     | 37° 44.8′    | 141° 29.3′    | 137            | 1.67         | 0.345         |
|      | 2011/10/18    | 37° 44.9′    | 141° 29.5′    | 133            | 1.74         | 0.324         |
|      | 2011/12/13    | 37° 44.9′    | 141° 29.3′    | 134            | 1.81         | 0.300         |
|      | 2012/2/20     | 37° 44.9′    | 141° 29.4′    | 135            | 1.83         | 0.259         |
| D1   | 2011/5/10     | 37° 34.2′    | 141° 23.0′    | 126            | 1.70         | 0.336         |
|      | 2011/5/24     | 37° 35.2′    | 141° 22.3′    | 126            | 1.54         | 0.443         |
|      | 2011/6/7      | 37° 35.0′    | 141° 22.2′    | 124            | 1.54         | 0.456         |
|      | 2011/6/21     | 37° 35.1′    | 141° 22.4′    | 124            | 1.55         | 0.412         |
|      | 2011/7/6      | 37° 35.0′    | 141° 22.2′    | 127            | 1.52         | 0.443         |
|      | 2011/7/30     | 37° 35.2′    | 141° 22.4′    | 125            | 1.52         | 0.443         |
|      | 2011/9/13     | 37° 35.0′    | 141° 22.3′    | 127            | 1.51         | 0.441         |
|      | 2011/9/13     | 37° 35.1′    | 141° 22.2′    | 127            | 1.53         | 0.456         |
|      | 2011/9/13     | 37° 35.0′    | 141° 22.3′    | 127            | 1.46         | 0.489         |
|      | 2011/9/13     | 37° 35.0′    | 141° 22.3′    | 127            | 1.38         | 0.539         |
|      | 2011/9/13     | 37° 35.0′    | 141° 22.3′    | 127            | 1.44         | 0.478         |
|      | 2011/9/13     | 37° 35.0′    | 141° 22.3′    | 127            | 1.51         | 0.445         |
|      | 2011/10/19    | 37° 35.0′    | 141° 22.4′    | 124            | 1.52         | 0.446         |
|      | 2011/12/13    | 37° 35.0′    | 141° 22.3′    | 124            | 1.46         | 0.514         |
|      | 2012/2/21     | 37° 35.0′    | 141° 22.4′    | 125            | 1.48         | 0.461         |
| D3   | 2011/9/13     | 37° 34.8′    | 141° 36.2′    | 228            | 1.70         | 0.323         |
|      | 2011/10/19    | 37° 34.9′    | 141° 36.4′    | 224            | 1.68         | 0.337         |
|      | 2011/12/14    | 37° 35.0′    | 141° 36.4′    | 225            | 1.72         | 0.327         |
|      | 2012/2/21     | 37° 34.9′    | 141° 36.4′    | 227            | 1.65         | 0.348         |
| E1   | 2011/5/10     | 37° 24.4′    | 141° 23.3′    | 138            | 1.63         | 0.363         |
|      | 2011/5/24     | 37° 25.0′    | 141° 22.7′    | 137            | 1.54         | 0.431         |
|      | 2011/6/7      | 37° 25.0′    | 141° 22.4′    | 135            | 1.54         | 0.425         |
|      | 2011/6/21     | 37° 24.9′    | 141° 22.4′    | 135            | 1.56         | 0.418         |
|      | 2011/7/6      | 37° 24.9′    | 141° 22.3′    | 138            | 1.54         | 0.439         |
|      | 2011/7/29     | 37° 24.8′    | 141° 22.3′    | 133            | 1.54         | 0.439         |
|      | 2011/9/11     | 37° 24.9′    | 141° 22.3′    | 136            | 1.50         | 0.455         |
|      | 2011/10/22    | 37° 25.6′    | 141° 22.1′    | 135            | 1.44         | 0.501         |
|      | 2011/12/10    | 37° 25.0′    | 141° 22.3′    | 135            | 1.43         | 0.509         |
|      | 2012/2/13     | 37° 25.0′    | 141° 22.4′    | 135            | 1.35         | 0.496         |
| E3   | 2011/9/11     | 37° 25.0′    | 141° 36.4′    | 238            | 1.70         | 0.349         |
|      | 2011/10/22    | 37° 24.7′    | 141° 36.4′    | 232            | 1.68         | 0.343         |
|      | 2011/12/10    | 37° 24.9′    | 141° 36.3′    | 231            | 1.65         | 0.350         |
|      | 2012/2/13     | 37° 25.0′    | 141° 36.4′    | 235            | 1.62         | 0.373         |
| E5   | 2011/9/13     | 37° 30.2′    | 141° 59.9′    | 545            | 1.63         | 0.398         |
|      | 2011/10/19    | 37° 30.0′    | 141° 59.9′    | 533            | 1.63         | 0.377         |

| Stn. | Sampling Date | Latitude (N) | Longitude (E) | Water Depth(m) | Bulk Density | Water Content |
|------|---------------|--------------|---------------|----------------|--------------|---------------|
| E5   | 2011/12/14    | 37° 30.0′    | 141° 59.9′    | 530            | 1.65         | 0.357         |
|      | 2012/2/16     | 37° 29.9′    | 141° 59.6′    | 535            | 1.68         | 0.343         |
| F1   | 2011/5/9      | 37° 15.1′    | 141° 22.7′    | 142            | 1.60         | 0.393         |
|      | 2011/5/23     | 37° 15.6′    | 141° 22.3′    | 146            | 1.68         | 0.321         |
|      | 2011/6/6      | 37° 15.0′    | 141° 22.3′    | 143            | 1.58         | 0.413         |
|      | 2011/6/20     | 37° 14.9′    | 141° 22.4′    | 144            | 1.60         | 0.392         |
|      | 2011/7/5      | 37° 14.8′    | 141° 22.5′    | 142            | 1.64         | 0.361         |
|      | 2011/7/29     | 37° 14.9′    | 141° 22.3′    | 141            | 1.64         | 0.361         |
|      | 2011/9/11     | 37° 14.9′    | 141° 22.2′    | 145            | 1.57         | 0.424         |
|      | 2011/10/23    | 37° 15.0′    | 141° 22.5′    | 142            | 1.59         | 0.397         |
|      | 2011/12/9     | 37° 15.0′    | 141° 22.3′    | 143            | 1.44         | 0.454         |
|      | 2012/2/12     | 37° 15.0′    | 141° 22.4′    | 144            | 1.52         | 0.420         |
| F3   | 2011/9/11     | 37° 14.9′    | 141° 36.4′    | 241            | 1.66         | 0.352         |
|      | 2011/10/22    | 37° 15.0′    | 141° 36.5′    | 236            | 1.60         | 0.377         |
|      | 2011/12/9     | 37° 15.0′    | 141° 36.3′    | 233            | 1.63         | 0.373         |
|      | 2012/2/13     | 37° 15.0′    | 141° 36.4′    | 237            | 1.66         | 0.351         |
| G0   | 2011/9/10     | 37° 05.0′    | 141° 08.5′    | 109            | 1.40         | 0.531         |
|      | 2011/10/23    | 37° 05.0′    | 141° 08.5′    | 107            | 1.46         | 0.433         |
|      | 2011/12/9     | 37° 05.0′    | 141° 08.4′    | 108            | 1.46         | 0.510         |
|      | 2012/2/11     | 37° 05.0′    | 141° 08.4′    | 107            | 1.30         | 0.581         |
| G1   | 2011/5/9      | 37° 05.3′    | 141° 15.5′    | 138            | 1.55         | 0.417         |
|      | 2011/5/23     | 37° 05.3′    | 141° 14.6′    | 141            | 1.43         | 0.501         |
|      | 2011/6/6      | 37° 04.8′    | 141° 15.3′    | 140            | 1.47         | 0.488         |
|      | 2011/6/20     | 37° 04.9′    | 141° 15.3′    | 141            | 1.47         | 0.472         |
|      | 2011/7/5      | 37° 05.0′    | 141° 15.4′    | 140            | 1.49         | 0.466         |
|      | 2011/7/28     | 37° 04.9′    | 141° 15.4′    | 140            | 1.49         | 0.466         |
|      | 2011/9/10     | 37° 04.8′    | 141° 15.5′    | 142            | 1.41         | 0.516         |
|      | 2011/10/23    | 37° 05.0′    | 141° 15.6′    | 141            | 1.41         | 0.521         |
|      | 2011/12/9     | 37° 04.9′    | 141° 15.4′    | 140            | 1.28         | 0.523         |
|      | 2012/2/12     | 37° 04.9′    | 141° 15.5′    | 141            | 1.42         | 0.502         |
| G3   | 2011/9/10     | 37° 04.9′    | 141° 29.3′    | 215            | 1.83         | 0.291         |
|      | 2011/10/24    | 37° 04.9′    | 141° 29.2′    | 210            | 1.89         | 0.267         |
|      | 2011/12/8     | 37° 04.9′    | 141° 29.2′    | 209            | 1.87         | 0.249         |
|      | 2012/2/10     | 37° 04.9′    | 141° 29.3′    | 213            | 1.80         | 0.273         |
| G4   | 2011/9/10     | 37° 01.0′    | 141° 44.9′    | 675            | 1.34         | 0.578         |
|      | 2011/10/24    | 36° 59.9′    | 141° 44.9′    | 664            | 1.44         | 0.498         |
|      | 2011/12/8     | 36° 59.8′    | 141° 45.0′    | 662            | 1.46         | 0.520         |
|      | 2012/2/10     | 37° 00.0′    | 141° 45.2′    | 666            | 1.39         | 0.526         |
| H1   | 2011/5/13     | 36° 55.4′    | 141° 08.0′    | 132            | 1.52         | 0.446         |
|      | 2011/5/27     | 36° 55.0′    | 141° 08.2′    | 135            | 1.63         | 0.369         |
|      | 2011/6/10     | 36° 55.1′    | 141° 08.2′    | 136            | 1.65         | 0.387         |

| Stn. | Sampling Date | Latitude (N) | Longitude (E) | Water Depth(m) | Bulk Density | Water Content |
|------|---------------|--------------|---------------|----------------|--------------|---------------|
| H1   | 2011/6/25     | 36° 54.7′    | 141° 08.1′    | 131            | 1.57         | 0.427         |
|      | 2011/7/5      | 36° 55.1′    | 141° 08.5′    | 130            | 1.73         | 0.334         |
|      | 2011/7/25     | 36° 54.9′    | 141° 08.4′    | 136            | 1.64         | 0.379         |
|      | 2011/9/9      | 36° 54.9′    | 141° 08.3′    | 137            | 1.42         | 0.512         |
|      | 2011/10/23    | 36° 54.9′    | 141° 08.4′    | 134            | 1.53         | 0.437         |
|      | 2011/12/7     | 36° 55.0′    | 141° 08.3′    | 134            | 1.45         | 0.424         |
|      | 2012/2/9      | 36° 54.9′    | 141° 08.3′    | 134            | 1.53         | 0.454         |
| H3   | 2011/9/9      | 36° 55.0′    | 141° 22.3′    | 238            | 1.61         | 0.405         |
|      | 2011/10/24    | 36° 55.0′    | 141° 22.0′    | 232            | 1.64         | 0.377         |
|      | 2011/12/7     | 36° 55.0′    | 141° 22.4′    | 234            | 1.58         | 0.394         |
|      | 2012/2/10     | 36° 55.0′    | 141° 22.4′    | 236            | 1.57         | 0.405         |
| I0   | 2011/9/9      | 36° 44.9′    | 140° 53.1′    | 74             | 1.44         | 0.491         |
|      | 2011/10/25    | 36° 45.6′    | 140° 53.0′    | 73             | 1.46         | 0.483         |
|      | 2011/12/7     | 36° 45.0′    | 140° 53.0′    | 73             | 1.43         | 0.496         |
|      | 2012/2/9      | 36° 45.0′    | 140° 53.0′    | 72             | 1.40         | 0.506         |
| I1   | 2011/5/13     | 36° 45.7′    | 140° 57.6′    | 102            | 1.45         | 0.466         |
|      | 2011/5/27     | 36° 45.1′    | 140° 56.9′    | 100            | 1.45         | 0.493         |
|      | 2011/6/9      | 36° 45.4′    | 140° 56.8′    |                | 1.42         | 0.502         |
|      | 2011/6/23     | 36° 45.0′    | 140° 57.1′    | 95             | 1.41         | 0.490         |
|      | 2011/7/6      | 36° 45.0′    | 140° 56.9′    | 95             | 1.44         | 0.494         |
|      | 2011/7/28     | 36° 44.9′    | 140° 56.8′    | 98             | 1.44         | 0.494         |
|      | 2011/9/9      | 36° 44.9′    | 140° 57.1′    | 101            | 1.38         | 0.544         |
|      | 2011/10/25    | 36° 45.0′    | 140° 57.0′    | 99             | 1.43         | 0.530         |
|      | 2011/12/7     | 36° 45.0′    | 140° 56.9′    | 99             | 1.33         | 0.593         |
|      | 2012/2/9      | 36° 45.0′    | 140° 57.0′    | 99             | 1.28         | 0.640         |
| I3   | 2011/9/9      | 36° 44.9′    | 141° 11.0′    | 192            | 1.85         | 0.265         |
|      | 2011/10/25    | 36° 45.0′    | 141° 10.9′    | 184            | 1.87         | 0.253         |
|      | 2011/12/7     | 36° 44.9′    | 141° 10.9′    | 185            | 1.87         | 0.261         |
|      | 2012/2/9      | 36° 45.1′    | 141° 11.0′    | 184            | 1.85         | 0.261         |
| J1   | 2011/5/13     | 36° 25.7′    | 140° 43.1′    | 51             | 1.75         | 0.211         |
|      | 2011/5/25     | 36° 24.9′    | 140° 43.1′    | 48             | 1.96         | 0.200         |
|      | 2011/6/8      | 36° 24.9′    | 140° 42.9′    | 48             | 1.73         | 0.188         |
|      | 2011/6/22     | 36° 24.9′    | 140° 43.0′    | 43             | 1.75         | 0.148         |
|      | 2011/7/6      | 36° 25.1′    | 140° 42.9′    | 43             | 1.69         | 0.218         |
|      | 2011/7/27     | 36° 24.9′    | 140° 43.0′    | 48             | 1.69         | 0.218         |
|      | 2011/9/8      | 36° 25.0′    | 140° 42.8′    | 50             | 1.44         | 0.505         |
|      | 2011/10/26    | 36° 25.1′    | 140° 43.0′    | 49             | 1.81         | 0.245         |
|      | 2011/12/6     | 36° 25.1′    | 140° 43.1′    | 50             | 1.56         | 0.215         |
|      | 2012/2/6      | 36° 25.0′    | 140° 42.8′    | 47             | 1.84         | 0.241         |
| J2   | 2011/9/8      | 36° 25.2′    | 140° 57.2′    | 297            | 1.55         | 0.419         |
|      | 2011/10/26    | 36° 24.9′    | 140° 57.0′    | 291            | 1.56         | 0.440         |

| Stn. | Sampling Date | Latitude (N) | Longitude (E) | Water Depth(m) | Bulk Density | Water Content |
|------|---------------|--------------|---------------|----------------|--------------|---------------|
| J2   | 2011/12/6     | 36° 24.9′    | 140° 56.9′    | 284            | 1.51         | 0.468         |
|      | 2012/2/5      | 36° 25.1′    | 140° 57.0′    | 291            | 1.47         | 0.454         |
| J3   | 2011/9/8      | 36° 24.9′    | 141° 04.3′    | 591            | 1.26         | 0.651         |
|      | 2011/10/25    | 36° 25.0′    | 141° 03.9′    | 570            | 1.25         | 0.653         |
|      | 2011/12/6     | 36° 25.0′    | 141° 04.2′    | 573            | 1.18         | 0.718         |
|      | 2012/2/5      | 36° 25.1′    | 141° 04.1′    | 571            | 1.25         | 0.674         |
| K1   | 2011/5/14     | 36° 04.3′    | 140° 43.3′    | 31             | 1.83         | 0.281         |
|      | 2011/5/25     | 36° 04.9′    | 140° 43.0′    | 26             | 1.82         | 0.261         |
|      | 2011/6/7      | 36° 04.1′    | 140° 42.9′    | 31             | 1.83         | 0.273         |
|      | 2011/6/22     | 36° 04.1′    | 140° 42.8′    | 25             | 1.96         | 0.250         |
|      | 2011/7/7      | 36° 04.0′    | 140° 43.0′    | 25             | 1.84         | 0.257         |
|      | 2011/7/26     | 36° 04.0′    | 140° 43.1′    | 31             | 1.84         | 0.257         |
|      | 2011/9/7      | 36° 04.0′    | 140° 43.2′    | 33             | 1.64         | 0.239         |
|      | 2011/10/14    | 36° 04.0′    | 140° 43.0′    | 32             | 1.76         | 0.280         |
|      | 2011/12/5     | 36° 04.1′    | 140° 42.7′    | 27             | 1.93         | 0.237         |
|      | 2012/2/5      | 36° 04.0′    | 140° 43.0′    | 29             | 1.48         | 0.216         |
| K2   | 2011/9/7      | 36° 04.2′    | 140° 57.1′    | 215            | 1.49         | 0.449         |
|      | 2011/10/13    | 36° 04.1′    | 140° 56.9′    | 211            | 1.57         | 0.401         |
|      | 2011/12/5     | 36° 04.0′    | 140° 56.9′    | 206            | 1.58         | 0.408         |
|      | 2012/2/4      | 36° 04.0′    | 140° 57.0′    | 210            | 1.50         | 0.443         |
| L1   | 2011/5/14     | 35° 45.3′    | 140° 56.8′    | 42             | 1.86         | 0.118         |
|      | 2011/5/26     | 35° 45.1′    | 140° 56.6′    | 28             | 1.97         | 0.160         |
|      | 2011/6/6      | 35° 45.0′    | 140° 57.0′    | 39             | 1.75         | 0.077         |
|      | 2011/6/20     | 35° 45.1′    | 140° 57.0′    | 40             | 2.00         | 0.103         |
|      | 2011/7/9      | 35° 44.8′    | 140° 57.1′    | 45             | 2.18         | 0.114         |
|      | 2011/7/26     | 35° 44.9′    | 140° 56.8′    | 43             | 1.98         | 0.162         |
|      | 2011/9/7      | 35° 44.8′    | 140° 57.0′    | 44             | 2.00         | 0.118         |
|      | 2011/10/13    | 35° 45.1′    | 140° 57.1′    | 44             | 2.14         | 0.121         |
|      | 2011/12/5     | 35° 45.0′    | 140° 57.1′    | 45             | 1.41         | 0.126         |
|      | 2012/2/4      | 35° 45.0′    | 140° 56.9′    | 43             | 1.76         | 0.127         |
| L3   | 2011/9/7      | 35° 45.2′    | 141° 10.9′    | 167            | 1.58         | 0.411         |
|      | 2011/10/13    | 35° 45.0′    | 141° 10.9′    | 168            | 1.52         | 0.450         |
|      | 2011/12/5     | 35° 45.0′    | 141° 10.8′    | 165            | 1.55         | 0.449         |
|      | 2012/2/4      | 35° 45.3′    | 141° 11.0′    | 168            | 1.56         | 0.409         |
