# Supplementary material for: Spatiotemporal distributions of Fukushima-derived radionuclides in nearby marine surface sediments
Source: Copernicus journal article supplement (doi:10.5194/bg-10-5019-2013), 2013-07-25
Supplement: Supplementary file 3 [file bg-10-5019-2013-supplement.zip]

Table S2-1. Concentrations of radionuclides in the sediments collected in the waters off Miyagi, Fukushima, and Ibaraki Prefectures in Japan

| Stn. | Sampling Date | Cs-134 (Bq/kg) | Cs-137 (Bq/kg) | Stn. | Sampling Date | Cs-134 (Bq/kg) | Cs-137 (Bq/kg) |
|------|---------------|----------------|----------------|------|---------------|----------------|----------------|
| A1   | 2011/5/11     | 5.7 ± 0.27     | 7.1 ± 0.32     | G1   | 2011/5/9      | 25 ± 0.35      | 27 ± 0.27      |
|      | 2011/5/26     | 8.3 ± 0.3      | 8.6 ± 0.27     |      | 2011/5/23     | 53 ± 0.77      | 60 ± 0.6       |
|      | 2011/6/10     | 7.9 ± 0.3      | 9 ± 0.28       |      | 2011/6/6      | 39 ± 0.71      | 41 ± 0.56      |
|      | 2011/6/23     | 11 ± 0.18      | 11 ± 0.21      |      | 2011/6/20     | 79 ± 0.61      | 89 ± 0.7       |
|      | 2011/7/8      | 4.4 ± 0.19     | 5 ± 0.24       |      | 2011/7/5      | 36 ± 0.67      | 42 ± 0.53      |
|      | 2011/7/31     | 6.7 ± 0.21     | 8.1 ± 0.27     |      | 2011/7/28     | 36 ± 0.34      | 41 ± 0.39      |
|      | 2011/9/15     | 6.8 ± 0.16     | 8.4 ± 0.22     |      | 2011/9/10     | 43 ± 0.44      | 52 ± 0.61      |
|      | 2011/10/17    | 3.7 ± 0.37     | 4.7 ± 0.27     |      | 2011/10/23    | 83 ± 0.61      | 98 ± 0.62      |
|      | 2011/12/15    | 4.9 ± 0.29     | 7.5 ± 0.25     |      | 2011/12/9     | 76 ± 0.54      | 92 ± 0.56      |
|      | 2012/2/19     | 5.8 ± 0.15     | 8.7 ± 0.2      |      | 2012/2/12     | 59 ± 0.47      | 74 ± 0.52      |
| a1   | 2011/9/15     | 9.5 ± 0.17     | 12 ± 0.22      | G3   | 2011/9/10     | 31 ± 0.29      | 38 ± 0.35      |
|      | 2011/10/17    | 13 ± 0.2       | 16 ± 0.25      |      | 2011/10/24    | 22 ± 0.26      | 28 ± 0.33      |
|      | 2011/12/16    | 9.2 ± 0.16     | 12 ± 0.21      |      | 2011/12/8     | 27 ± 0.24      | 36 ± 0.28      |
|      | 2012/2/20     | 11 ± 0.17      | 15 ± 0.24      |      | 2012/2/10     | 32 ± 0.29      | 44 ± 0.35      |
| A3   | 2011/9/15     | 7.3 ± 0.18     | 9.1 ± 0.19     | G4   | 2011/9/10     | 20 ± 0.31      | 25 ± 0.37      |
|      | 2011/10/17    | 5.7 ± 0.16     | 7.4 ± 0.22     |      | 2011/10/24    | 31 ± 0.32      | 38 ± 0.36      |
|      | 2011/12/15    | 20 ± 0.25      | 27 ± 0.32      |      | 2011/12/8     | 21 ± 0.29      | 27 ± 0.35      |
|      | 2012/2/19     | 3.4 ± 0.11     | 5.1 ± 0.16     |      | 2012/2/10     | 30 ± 0.34      | 43 ± 0.39      |
| B1   | 2011/5/11     | 110 ± 0.59     | 110 ± 0.66     | H1   | 2011/5/13     | 21 ± 0.35      | 24 ± 0.41      |
|      | 2011/5/25     | 72 ± 0.47      | 78 ± 0.53      |      | 2011/5/27     | 53 ± 0.75      | 56 ± 0.58      |
|      | 2011/6/9      | 15 ± 0.23      | 18 ± 0.27      |      | 2011/6/10     | 46 ± 0.74      | 51 ± 0.58      |
|      | 2011/6/22     | 25 ± 0.29      | 29 ± 0.34      |      | 2011/6/25     | 36 ± 0.56      | 45 ± 0.44      |
|      | 2011/7/7      | 24 ± 0.28      | 26 ± 0.33      |      | 2011/7/5      | 37 ± 0.4       | 42 ± 0.47      |
|      | 2011/7/31     | 29 ± 0.3       | 34 ± 0.35      |      | 2011/7/25     | 44 ± 0.39      | 49 ± 0.53      |
|      | 2011/9/14     | 24 ± 0.22      | 29 ± 0.27      |      | 2011/9/9      | 59 ± 0.47      | 72 ± 0.49      |
|      | 2011/10/18    | 35 ± 0.26      | 44 ± 0.32      |      | 2011/10/23    | 70 ± 0.44      | 86 ± 0.55      |
|      | 2011/12/16    | 8.8 ± 0.2      | 13 ± 0.14      |      | 2011/12/7     | 49 ± 0.34      | 65 ± 0.46      |
|      | 2012/2/17     | 9.9 ± 0.15     | 14 ± 0.19      |      | 2012/2/9      | 63 ± 0.44      | 87 ± 0.52      |
| B3   | 2011/9/14     | 420 ± 0.89     | 490 ± 0.96     | H3   | 2011/9/9      | 39 ± 0.44      | 47 ± 0.4       |
|      | 2011/10/18    | 320 ± 1.2      | 380 ± 1.4      |      | 2011/10/24    | 30 ± 0.3       | 37 ± 0.37      |
|      | 2011/12/14    | 280 ± 1.1      | 360 ± 1.1      |      | 2011/12/7     | 57 ± 0.4       | 75 ± 0.45      |
|      | 2012/2/17     | 290 ± 0.92     | 390 ± 1.1      |      | 2012/2/10     | 40 ± 0.32      | 56 ± 0.39      |
| C1   | 2011/5/11     | 88 ± 0.42      | 94 ± 0.45      | I0   | 2011/9/9      | 210 ± 0.76     | 240 ± 0.87     |
|      | 2011/5/25     | 54 ± 0.32      | 58 ± 0.35      |      | 2011/10/25    | 200 ± 0.8      | 240 ± 0.96     |
|      | 2011/6/9      | 42 ± 0.33      | 46 ± 0.45      |      | 2011/12/7     | 220 ± 0.89     | 270 ± 1.1      |
|      | 2011/6/22     | 19 ± 0.24      | 20 ± 0.29      |      | 2012/2/9      | 190 ± 0.77     | 260 ± 1        |
|      | 2011/7/7      | 23 ± 0.26      | 26 ± 0.32      | I1   | 2011/5/13     | 10 ± 0.23      | 12 ± 0.27      |
|      | 2011/7/30     | 43 ± 0.29      | 49 ± 0.32      |      | 2011/5/27     | 57 ± 0.44      | 62 ± 0.39      |
|      | 2011/9/14     | 18 ± 0.31      | 21 ± 0.27      |      | 2011/6/9      | 30 ± 0.41      | 33 ± 0.32      |
|      | 2011/10/19    | 23 ± 0.22      | 28 ± 0.27      |      | 2011/6/23     | 19 ± 0.34      | 22 ± 0.42      |
|      | 2011/12/13    | 14 ± 0.11      | 19 ± 0.13      |      | 2011/7/6      | 45 ± 0.48      | 49 ± 0.55      |
|      | 2012/2/17     | 11 ± 0.13      | 15 ± 0.16      |      | 2011/7/28     | 64 ± 0.6       | 72 ± 0.44      |
|      |               |                |                |      | 2011/9/9      | 110 ± 0.57     | 130 ± 0.65     |
|      |               |                |                |      | 2011/10/25    | 110 ± 0.92     | 140 ± 0.71     |
|      |               |                |                |      | 2011/12/7     | 250 ± 1        | 310 ± 1.3      |
|      |               |                |                |      | 2012/2/9      | 210 ± 0.85     | 280 ± 1.1      |
| C3   | 2011/9/14     | 140 ± 0.6      | 180 ± 0.47     | I3   | 2011/9/9      | 16 ± 0.19      | 20 ± 0.22      |
|      | 2011/10/18    | 68 ± 0.43      | 83 ± 0.52      |      | 2011/10/25    | 20 ± 0.27      | 26 ± 0.31      |
|      | 2011/12/13    | 66 ± 0.39      | 87 ± 0.48      |      | 2011/12/7     | 20 ± 0.22      | 27 ± 0.27      |
|      | 2012/2/20     | 63 ± 0.37      | 85 ± 0.44      |      | 2012/2/9      | 17 ± 0.22      | 23 ± 0.25      |
| D1   | 2011/5/10     | 300 ± 1.6      | 320 ± 1.2      | J1   | 2011/5/13     | 49 ± 0.71      | 50 ± 0.54      |
|      | 2011/5/24     | 180 ± 0.9      | 210 ± 1        |      | 2011/5/25     | 26 ± 0.44      | 28 ± 0.37      |
|      | 2011/6/7      | 140 ± 1.2      | 160 ± 0.93     |      | 2011/6/8      | 230 ± 0.91     | 250 ± 0.68     |
|      | 2011/6/21     | 160 ± 0.65     | 170 ± 0.71     |      | 2011/6/22     | 120 ± 0.6      | 130 ± 0.67     |
|      | 2011/7/6      | 100 ± 0.55     | 110 ± 0.61     | J1   | 2011/7/6      | 180 ± 0.64     | 200 ± 0.7      |
|      | 2011/7/30     | 140 ± 1.1      | 150 ± 0.84     |      |               |                |                |
|      | 2011/9/13     | 130 ± 0.61     | 170 ± 0.74     |      |               |                |                |
|      | 2011/9/13     | 280 ± 0.71     | 330 ± 0.78     |      |               |                |                |
|      | 2011/9/13     | 160 ± 1        | 190 ± 0.76     |      |               |                |                |

| Stn. | Sampling Date | Cs-134 (Bq/kg) | Cs-137 (Bq/kg) | Stn. | Sampling Date | Cs-134 (Bq/kg) | Cs-137 (Bq/kg) |
|------|---------------|----------------|----------------|------|---------------|----------------|----------------|
| D1   | 2011/9/13     | 180 ± 0.69     | 210 ± 0.79     | J1   | 2011/7/27     | 160 ± 0.71     | 180 ± 0.8      |
|      | 2011/9/13     | 420 ± 1        | 500 ± 1        |      | 2011/9/8      | 440 ± 1.1      | 520 ± 1.3      |
|      | 2011/9/13     | 500 ± 1.7      | 580 ± 1.3      |      | 2011/10/26    | 47 ± 0.26      | 57 ± 0.3       |
|      | 2011/10/19    | 150 ± 0.77     | 190 ± 0.76     |      | 2011/12/6     | 27 ± 0.16      | 35 ± 0.19      |
|      | 2011/12/13    | 140 ± 0.6      | 180 ± 0.72     |      | 2012/2/6      | 44 ± 0.21      | 60 ± 0.25      |
|      | 2012/2/21     | 76 ± 0.36      | 100 ± 0.44     |      |               |                |                |
| D3   | 2011/9/13     | 30 ± 0.18      | 35 ± 0.2       | J2   | 2011/9/8      | 24 ± 0.26      | 28 ± 0.3       |
|      | 2011/10/19    | 39 ± 0.3       | 49 ± 0.36      |      | 2011/10/26    | 22 ± 0.47      | 28 ± 0.4       |
|      | 2011/12/14    | 33 ± 0.23      | 41 ± 0.27      |      | 2011/12/6     | 31 ± 0.36      | 40 ± 0.34      |
|      | 2012/2/21     | 25 ± 0.2       | 34 ± 0.2       |      | 2012/2/5      | 36 ± 0.26      | 48 ± 0.37      |
| E1   | 2011/5/10     | 82 ± 0.47      | 85 ± 0.46      | J3   | 2011/9/8      | 28 ± 0.31      | 34 ± 0.36      |
|      | 2011/5/24     | 33 ± 0.4       | 37 ± 0.46      |      | 2011/10/25    | 27 ± 0.23      | 35 ± 0.37      |
|      | 2011/6/7      | 80 ± 0.89      | 88 ± 0.7       |      | 2011/12/6     | 37 ± 0.3       | 48 ± 0.42      |
|      | 2011/6/21     | 18 ± 0.21      | 20 ± 0.32      |      | 2012/2/5      | 24 ± 0.32      | 33 ± 0.41      |
|      | 2011/7/6      | 200 ± 0.92     | 210 ± 1        | K1   | 2011/5/14     | 7 ± 0.12       | 7.5 ± 0.11     |
|      | 2011/7/29     | 87 ± 0.58      | 100 ± 0.44     |      | 2011/5/25     | 4.9 ± 0.17     | 5.8 ± 0.22     |
|      | 2011/9/11     | 120 ± 0.62     | 150 ± 0.75     |      | 2011/6/7      | 51 ± 0.65      | 53 ± 0.5       |
|      | 2011/10/22    | 160 ± 0.81     | 200 ± 0.79     |      | 2011/6/22     | 63 ± 0.37      | 68 ± 0.39      |
|      | 2011/12/10    | 130 ± 0.67     | 170 ± 0.86     |      | 2011/7/7      | 53 ± 0.3       | 60 ± 0.33      |
|      | 2012/2/13     | 110 ± 0.64     | 140 ± 0.72     |      | 2011/7/26     | 110 ± 0.49     | 120 ± 0.54     |
| E3   | 2011/9/11     | 34 ± 0.4       | 43 ± 0.37      |      | 2011/9/7      | 28 ± 0.24      | 34 ± 0.28      |
|      | 2011/10/22    | 49 ± 0.4       | 64 ± 0.44      |      | 2011/10/14    | 25 ± 0.21      | 30 ± 0.24      |
|      | 2011/12/10    | 36 ± 0.33      | 47 ± 0.38      |      | 2011/12/5     | 14 ± 0.3       | 18 ± 0.26      |
|      | 2012/2/13     | 23 ± 0.26      | 32 ± 0.32      |      | 2012/2/5      | 6.6 ± 0.26     | 9 ± 0.23       |
| E5   | 2011/9/13     | 7.4 ± 0.33     | 9.6 ± 0.26     | K2   | 2011/9/7      | 18 ± 0.22      | 21 ± 0.26      |
|      | 2011/10/19    | 4.3 ± 0.17     | 5.8 ± 0.19     |      | 2011/10/13    | 19 ± 0.45      | 23 ± 0.41      |
|      | 2011/12/14    | 9.9 ± 0.19     | 14 ± 0.22      |      | 2011/12/5     | 14 ± 0.17      | 18 ± 0.21      |
|      | 2012/2/16     | 1.6 ± 0.12     | 2.7 ± 0.14     |      | 2012/2/4      | 13 ± 0.2       | 18 ± 0.19      |
| F1   | 2011/5/9      | 48 ± 0.38      | 50 ± 0.42      | L1   | 2011/5/14     | 1.6 ± 0.086    | 1.9 ± 0.09     |
|      | 2011/5/23     | 63 ± 0.62      | 67 ± 0.47      |      | 2011/5/26     | 1.2 ± 0.1      | 1.7 ± 0.13     |
|      | 2011/6/6      | 68 ± 0.45      | 73 ± 0.49      |      | 2011/6/6      | 23 ± 0.18      | 26 ± 0.28      |
|      | 2011/6/20     | 68 ± 0.77      | 77 ± 0.62      |      | 2011/6/20     | 22 ± 0.36      | 25 ± 0.35      |
|      | 2011/7/5      | 68 ± 0.53      | 79 ± 0.4       |      | 2011/7/9      | 19 ± 0.4       | 21 ± 0.32      |
|      | 2011/7/29     | 65 ± 0.52      | 77 ± 0.6       |      | 2011/7/26     | 13 ± 0.21      | 15 ± 0.17      |
|      | 2011/9/11     | 84 ± 0.52      | 97 ± 0.59      |      | 2011/9/7      | 7.5 ± 0.13     | 8.5 ± 0.14     |
|      | 2011/10/23    | 61 ± 0.42      | 77 ± 0.52      |      | 2011/10/13    | 7.6 ± 0.091    | 9.4 ± 0.14     |
|      | 2011/12/9     | 91 ± 0.54      | 120 ± 0.59     |      | 2011/12/5     | 5 ± 0.12       | 6.6 ± 0.15     |
|      | 2012/2/12     | 59 ± 0.42      | 81 ± 0.57      |      | 2012/2/4      | 5.3 ± 0.13     | 7.2 ± 0.17     |
| F3   | 2011/9/11     | 41 ± 0.34      | 50 ± 0.41      | L3   | 2011/9/7      | 11 ± 0.2       | 14 ± 0.22      |
|      | 2011/10/22    | 51 ± 0.41      | 65 ± 0.45      |      | 2011/10/13    | 18 ± 0.31      | 22 ± 0.32      |
|      | 2011/12/9     | 45 ± 0.36      | 59 ± 0.41      |      | 2011/12/5     | 16 ± 0.23      | 21 ± 0.3       |
|      | 2012/2/13     | 46 ± 0.32      | 64 ± 0.45      |      | 2012/2/4      | 9.1 ± 0.18     | 12 ± 0.25      |
| G0   | 2011/9/10     | 170 ± 1.1      | 200 ± 0.84     |      |               |                |                |
|      | 2011/10/23    | 200 ± 0.8      | 230 ± 0.94     |      |               |                |                |
|      | 2011/12/9     | 160 ± 0.8      | 200 ± 1.2      |      |               |                |                |
|      | 2012/2/11     | 140 ± 0.71     | 190 ± 0.78     |      |               |                |                |

Radioactivities listed above were corrected for decay for t<sub>r</sub>

ND: not detected
